# Supplementary material for: The role of catchment characteristics, discharge, and active layer thaw on seasonal stream chemistry across ten permafrost catchments
Source: Copernicus journal article supplement (doi:10.5194/egusphere-2024-2645), 2024-09-18
Supplement: Supplementary file 1 [file egusphere-2024-2645-supplement.pdf]

Table S1. Summary results from all GAMs.

| Site   | Solute   | R <sup>2</sup> | b     | b SE | p-value (Q) | CV Ratio | edf  | p-value (sDOY) | sDOY Range | Mean sDOY SE | n  |
|--------|----------|----------------|-------|------|-------------|----------|------|----------------|------------|--------------|----|
| BB     | Ca       | 0.58           | -0.31 | 0.04 | 0.00        | 0.12     | 1.00 | 0.00           | 0.49       | 0.09         | 43 |
| BB     | DOC      | 0.53           | 0.12  | 0.06 | 0.04        | 0.15     | 2.82 | 0.00           | 0.52       | 0.17         | 42 |
| BB     | Mg       | 0.22           | -0.54 | 0.15 | 0.00        | 0.43     | 1.00 | 0.11           | 0.89       | 0.33         | 43 |
| BB     | SpC      | 0.88           | -0.23 | 0.03 | 0.00        | 0.08     | 5.64 | 0.00           | 0.59       | 0.11         | 42 |
| BB     | Sulphate | 0.78           | -0.61 | 0.07 | 0.00        | 0.19     | 4.78 | 0.00           | 1.18       | 0.25         | 43 |
| CL     | Ca       | 0.63           | -0.36 | 0.05 | 0.00        | 0.22     | 2.90 | 0.16           | 0.37       | 0.11         | 34 |
| CL     | DOC      | 0.05           | -0.01 | 0.06 | 0.89        | 0.28     | 1.00 | 0.06           | 0.32       | 0.08         | 34 |
| CL     | Mg       | 0.66           | -0.52 | 0.07 | 0.00        | 0.40     | 2.62 | 0.25           | 0.43       | 0.14         | 34 |
| CL     | SpC      | 0.20           | -0.14 | 0.05 | 0.02        | 0.12     | 1.00 | 0.36           | 0.11       | 0.06         | 24 |
| CL     | Sulphate | 0.18           | -0.17 | 0.13 | 0.22        | 0.51     | 1.00 | 0.02           | 0.88       | 0.18         | 34 |
| GC     | Ca       | 0.65           | -0.37 | 0.05 | 0.00        | 0.16     | 3.40 | 0.01           | 0.40       | 0.16         | 79 |
| GC     | DOC      | 0.62           | 0.31  | 0.08 | 0.00        | 0.24     | 7.08 | 0.00           | 1.15       | 0.29         | 80 |
| GC     | Mg       | 0.39           | -0.61 | 0.09 | 0.00        | 0.40     | 1.00 | 0.12           | 0.62       | 0.20         | 79 |
| GC     | SpC      | 0.88           | -0.30 | 0.03 | 0.00        | 0.09     | 4.69 | 0.00           | 0.32       | 0.09         | 75 |
| GC     | Sulphate | 0.66           | -0.49 | 0.06 | 0.00        | 0.18     | 4.95 | 0.00           | 0.94       | 0.20         | 79 |
| Km 104 | Ca       | 0.91           | -0.10 | 0.03 | 0.00        | 0.12     | 3.69 | 0.00           | 2.14       | 0.16         | 28 |
| Km 104 | DOC      | 0.18           | -0.04 | 0.04 | 0.28        | 0.06     | 2.12 | 0.27           | 0.44       | 0.18         | 28 |
| Km 104 | Mg       | 0.87           | -0.10 | 0.03 | 0.01        | 0.17     | 3.17 | 0.00           | 2.23       | 0.20         | 28 |
| Km 104 | SpC      | 0.91           | -0.08 | 0.02 | 0.00        | 0.08     | 3.66 | 0.00           | 1.69       | 0.15         | 26 |
| Km 104 | Sulphate | 0.45           | -0.17 | 0.14 | 0.23        | 0.40     | 1.00 | 0.00           | 4.09       | 0.43         | 28 |
| Km 175 | Ca       | 0.93           | -0.26 | 0.03 | 0.00        | 0.20     | 3.82 | 0.00           | 1.35       | 0.08         | 40 |
| Km 175 | DOC      | 0.13           | 0.14  | 0.07 | 0.06        | 0.25     | 1.00 | 0.10           | 0.38       | 0.11         | 39 |
| Km 175 | Mg       | 0.74           | -0.42 | 0.05 | 0.00        | 0.26     | 2.09 | 0.01           | 0.57       | 0.13         | 40 |
| Km 175 | SpC      | 0.86           | -0.26 | 0.03 | 0.00        | 0.14     | 2.45 | 0.00           | 0.84       | 0.08         | 37 |
| Km 175 | Sulphate | 0.84           | -0.41 | 0.04 | 0.00        | 0.20     | 2.15 | 0.00           | 0.88       | 0.11         | 40 |
| Km 185 | Ca       | 0.92           | -0.17 | 0.02 | 0.00        | 0.12     | 4.92 | 0.00           | 1.70       | 0.09         | 35 |
| Km 185 | DOC      | 0.78           | 0.06  | 0.02 | 0.03        | 0.10     | 5.88 | 0.00           | 1.16       | 0.10         | 34 |
| Km 185 | Mg       | 0.90           | -0.20 | 0.03 | 0.00        | 0.17     | 4.30 | 0.00           | 1.73       | 0.10         | 35 |
| Km 185 | SpC      | 0.93           | -0.15 | 0.02 | 0.00        | 0.09     | 4.78 | 0.00           | 1.48       | 0.08         | 33 |
| Km 185 | Sulphate | 0.90           | -0.18 | 0.03 | 0.00        | 0.13     | 4.24 | 0.00           | 1.87       | 0.10         | 35 |
| Km 44  | Ca       | 0.44           | -0.12 | 0.03 | 0.00        | 0.09     | 1.67 | 0.01           | 0.39       | 0.09         | 43 |
| Km 44  | DOC      | 0.52           | -0.11 | 0.07 | 0.09        | 0.32     | 3.03 | 0.00           | 1.60       | 0.26         | 42 |
| Km 44  | Mg       | 0.53           | -0.17 | 0.03 | 0.00        | 0.14     | 2.31 | 0.00           | 0.54       | 0.13         | 43 |
| Km 44  | SpC      | 0.80           | -0.11 | 0.01 | 0.00        | 0.05     | 2.07 | 0.00           | 0.54       | 0.05         | 39 |
| Km 44  | Sulphate | 0.71           | -0.24 | 0.03 | 0.00        | 0.13     | 2.04 | 0.00           | 0.81       | 0.11         | 43 |
| Km 71  | Ca       | 0.91           | -0.33 | 0.04 | 0.00        | 0.25     | 4.11 | 0.00           | 1.36       | 0.11         | 35 |
| Km 71  | DOC      | 0.47           | 0.10  | 0.17 | 0.56        | 0.90     | 1.00 | 0.00           | 2.35       | 0.22         | 34 |
| Km 71  | Mg       | 0.88           | -0.36 | 0.04 | 0.00        | 0.23     | 3.29 | 0.00           | 1.16       | 0.09         | 35 |

|       |          |      |       |      |      |      |      |      |      |      |    |
|-------|----------|------|-------|------|------|------|------|------|------|------|----|
| Km 71 | SpC      | 0.39 | -0.31 | 0.10 | 0.00 | 0.21 | 1.00 | 0.00 | 1.06 | 0.12 | 34 |
| Km 71 | Sulphate | 0.86 | -0.36 | 0.04 | 0.00 | 0.19 | 3.20 | 0.00 | 1.23 | 0.10 | 35 |
| Km 99 | Ca       | 0.91 | -0.30 | 0.03 | 0.00 | 0.14 | 3.42 | 0.00 | 1.41 | 0.13 | 47 |
| Km 99 | DOC      | 0.41 | 0.13  | 0.05 | 0.01 | 0.11 | 2.28 | 0.02 | 0.76 | 0.18 | 45 |
| Km 99 | Mg       | 0.83 | -0.35 | 0.04 | 0.00 | 0.20 | 2.47 | 0.00 | 1.19 | 0.16 | 47 |
| Km 99 | SpC      | 0.94 | -0.29 | 0.02 | 0.00 | 0.11 | 5.30 | 0.00 | 1.07 | 0.13 | 41 |
| Km 99 | Sulphate | 0.77 | -0.47 | 0.06 | 0.00 | 0.20 | 1.91 | 0.00 | 1.35 | 0.22 | 47 |
| WCO   | Ca       | 0.50 | -0.29 | 0.04 | 0.00 | 0.23 | 2.62 | 0.05 | 0.30 | 0.10 | 92 |
| WCO   | DOC      | 0.73 | 0.20  | 0.06 | 0.00 | 0.52 | 7.18 | 0.00 | 1.19 | 0.22 | 92 |
| WCO   | Mg       | 0.73 | -0.41 | 0.03 | 0.00 | 0.34 | 2.61 | 0.00 | 0.43 | 0.09 | 92 |
| WCO   | SpC      | 0.68 | -0.18 | 0.03 | 0.00 | 0.13 | 4.22 | 0.00 | 0.27 | 0.08 | 69 |
| WCO   | Sulphate | 0.74 | -0.31 | 0.03 | 0.00 | 0.29 | 4.24 | 0.00 | 0.42 | 0.11 | 92 |
